# Supplementary material for: First trinuclear paramagnetic transition metal complexes with redox active ligands derived from TTF: Co2M(PhCOO)6(TTF-CHCH-py)2·2CH3CN, M = CoII, MnII
Source: Royal Society of Chemistry journal article supplement (doi:10.1039/b613191c), 2006-11-24
Supplement: b613191c.pdf [file b613191c.pdf]

## Supplementary information

### First trinuclear paramagnetic transition metal complexes with redox active ligands derived from TTF: $\text{Co}_2\text{M}(\text{PhCOO})_6(\text{TTF-CH=CH-py})_2 \cdot 2\text{CH}_3\text{CN}$ , $\text{M} = \text{Co}^{\text{II}}, \text{Mn}^{\text{II}}$

Konstantin S. Gavrilenko, Yann Le Gal, Olivier Cador, Stéphane Golhen and Lahcène Ouahab\*

The spin Hamiltonian of **2** is the following

$$H = -J \mathbf{S}_{\text{Co}} \cdot \mathbf{S}_{\text{Mn}} + g_{\text{Co}} \beta \mathbf{H} \cdot \mathbf{S}_{\text{Co}} + g_{\text{Mn}} \beta \mathbf{H} \cdot \mathbf{S}_{\text{Mn}} \quad \text{with } \mathbf{S}_{\text{Co}} = \mathbf{S}_{\text{Co}_1} + \mathbf{S}_{\text{Co}_2}$$

In using the total spin of the system:  $\mathbf{S} = \mathbf{S}_{\text{Mn}} + \mathbf{S}_{\text{Co}}$  the energy levels in zero field are expressed as

$$E(S, S_{\text{Co}}) = -\frac{J}{2} (S(S+1) - S_{\text{Co}}(S_{\text{Co}}+1) - S_{\text{Mn}}(S_{\text{Mn}}+1))$$

$S_{\text{Co}}$  varies by integer values from 0 to 3 and  $S$  by integer values, for a given value of  $S_{\text{Co}}$ , from  $|S_{\text{Co}} - 5/2|$  to  $S_{\text{Co}} + 5/2$  with  $S_{\text{Co}_1} = S_{\text{Co}_2} = 3/2$  and  $S_{\text{Mn}} = 5/2$ .

The Zeeman factors of each spin state with the energy  $E(S, S_{\text{Co}})$  are related to the local Zeeman factors  $g_{\text{Co}}$  and  $g_{\text{Mn}}$  through:

$$g(S, S_{\text{Co}}) = \frac{g_{\text{Co}} (S(S+1) + S_{\text{Co}}(S_{\text{Co}}+1) - S_{\text{Mn}}(S_{\text{Mn}}+1))}{2S(S+1)} + \frac{g_{\text{Mn}} (S(S+1) - S_{\text{Co}}(S_{\text{Co}}+1) + S_{\text{Mn}}(S_{\text{Mn}}+1))}{2S(S+1)}$$

The expression of the zero field magnetic susceptibility is obtained with the Van Vleck formula:

$$\chi_M T = \frac{N \beta^2}{3k} \frac{\sum_{S_{\text{Co}}=0}^3 \sum_{S=|S_{\text{Co}}-5/2|}^{S_{\text{Co}}+5/2} g(S, S_{\text{Co}})^2 S(S+1)(2S+1) \exp\left(\frac{-E(S, S_{\text{Co}})}{kT}\right)}{\sum_{S_{\text{Co}}=0}^3 \sum_{S=|S_{\text{Co}}-5/2|}^{S_{\text{Co}}+5/2} (2S+1) \exp\left(\frac{-E(S, S_{\text{Co}})}{kT}\right)}$$

Which finally gives:

$$\chi_M T = \frac{N\beta^2}{3k} \left\{ \begin{array}{l} \frac{3}{2} \left( \frac{8}{3} g_{Co} - \frac{5}{3} g_{Mn} \right)^2 \exp\left(\frac{-10J}{kT}\right) + 15 \left( \frac{14}{15} g_{Co} + \frac{1}{15} g_{Mn} \right)^2 \exp\left(\frac{-17J}{2kT}\right) \\ + \frac{3}{2} \left( -\frac{4}{3} g_{Co} + \frac{7}{3} g_{Mn} \right)^2 \exp\left(\frac{-7J}{kT}\right) + \frac{105}{2} \left( \frac{24}{35} g_{Co} + \frac{11}{35} g_{Mn} \right)^2 \exp\left(\frac{-6J}{kT}\right) \\ + 15 \left( \frac{2}{15} g_{Co} + \frac{13}{15} g_{Mn} \right)^2 \exp\left(\frac{-11J}{2kT}\right) + 15 \left( -\frac{2}{5} g_{Co} + \frac{7}{5} g_{Mn} \right)^2 \exp\left(\frac{-7J}{2kT}\right) \\ + \frac{105}{2} \left( \frac{12}{35} g_{Co} + \frac{23}{35} g_{Mn} \right)^2 \exp\left(\frac{-3J}{kT}\right) + 126 \left( \frac{38}{63} g_{Co} + \frac{25}{63} g_{Mn} \right)^2 \exp\left(\frac{5J}{2kT}\right) \\ + \frac{105}{2} \left( \frac{4}{35} g_{Co} + \frac{31}{35} g_{Mn} \right)^2 \exp\left(\frac{J}{kT}\right) + \frac{105}{2} (g_{Mn})^2 \\ + 126 \left( \frac{26}{63} g_{Co} + \frac{37}{63} g_{Mn} \right)^2 \exp\left(\frac{J}{2kT}\right) + \frac{495}{2} \left( \frac{56}{99} g_{Co} + \frac{43}{99} g_{Mn} \right)^2 \exp\left(\frac{2J}{kT}\right) \\ + 126 \left( \frac{2}{7} g_{Co} + \frac{5}{7} g_{Mn} \right)^2 \exp\left(\frac{5J}{2kT}\right) + \frac{495}{2} \left( \frac{4}{9} g_{Co} + \frac{5}{9} g_{Mn} \right)^2 \exp\left(\frac{5J}{kT}\right) \\ + 429 \left( \frac{6}{11} g_{Co} + \frac{5}{11} g_{Mn} \right)^2 \exp\left(\frac{15J}{2kT}\right) \end{array} \right\} \\ \left\{ \begin{array}{l} 2 \exp\left(\frac{-10J}{kT}\right) + 4 \exp\left(\frac{-17J}{2kT}\right) + 2 \exp\left(\frac{-7J}{kT}\right) + 6 \exp\left(\frac{-6J}{kT}\right) + 4 \exp\left(\frac{-11J}{2kT}\right) \\ + 4 \exp\left(\frac{-7J}{2kT}\right) + 6 \exp\left(\frac{-3J}{kT}\right) + 8 \exp\left(\frac{5J}{2kT}\right) + 6 \exp\left(\frac{J}{kT}\right) + 6 \\ + 8 \exp\left(\frac{J}{2kT}\right) + 10 \exp\left(\frac{2J}{kT}\right) + 8 \exp\left(\frac{5J}{2kT}\right) + 10 \exp\left(\frac{5J}{kT}\right) + 12 \exp\left(\frac{15J}{2kT}\right) \end{array} \right\}$$

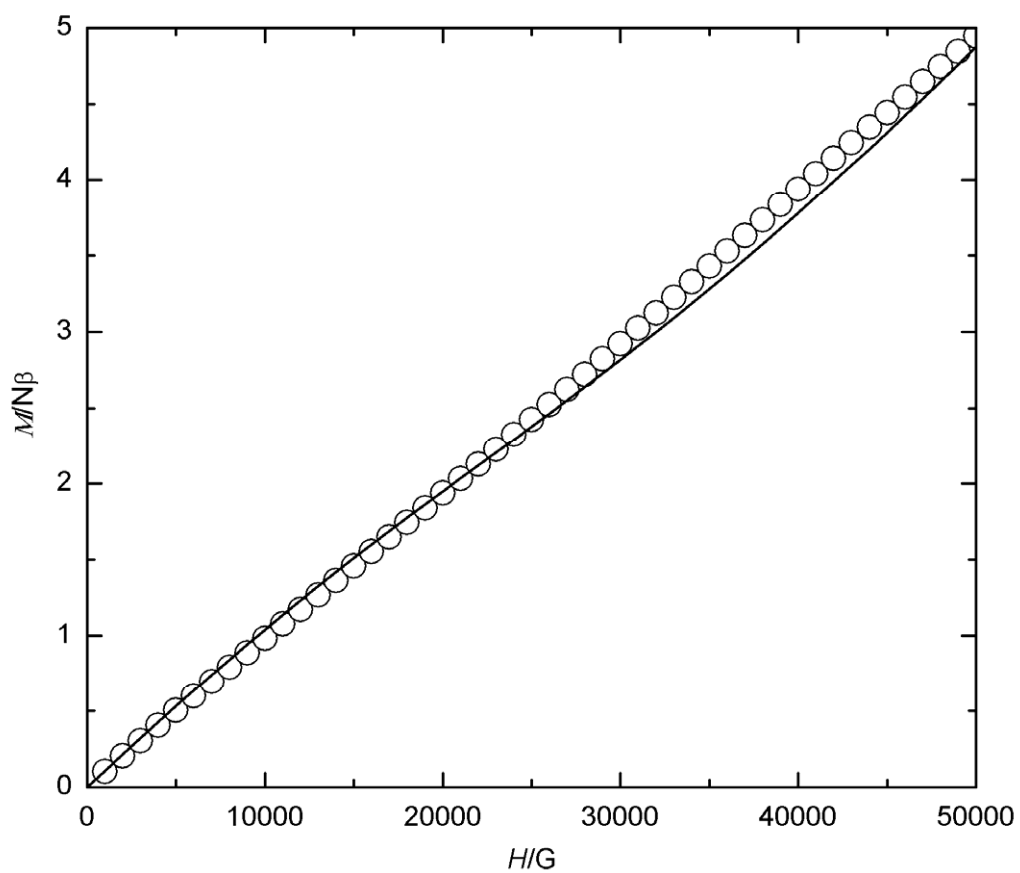

Fig S1. Field dependence of the magnetisation of **2** at 2 K ( $\circ$ ) with the calculated curve using parameters given in main text ( $J = -1.80 \text{ cm}^{-1}$ ,  $g_{\text{Co}} = 2.29$  and  $g_{\text{Mn}} = 2.00$ ).
